# Supplementary material for: A Nonsense Variant in the DMD Gene Causes X-Linked Muscular Dystrophy in the Maine Coon Cat
Source: MDPI journal article supplement (doi:10.3390/ani12212928), 2022-10-25
Supplement: s1 [file s1]

## Supplementary information

### 1. Tables

**Table S1. Monoclonal antibodies used for indirect immunofluorescence.** NCL-SPEC2 was used as a control for membrane integrity and NCL-MHCd to detect regenerating fibers.

| Name              | Target                      | Dilution used | Source                      |
|-------------------|-----------------------------|---------------|-----------------------------|
| NCL-DYS1          | Dystrophin rod domain       | 1:100         | Novocastra Laboratories, UK |
| NCL-DYS2          | Dystrophin carboxy terminus | 1:100         | Novocastra Laboratories, UK |
| NCL-DRP2          | Utrophin                    | 1:20          | Novocastra Laboratories, UK |
| $\alpha$ -SG      | $\alpha$ -sarcoglycan       | 1:200         | Gift of Eva Engvall [48]    |
| NCL- $\beta$ SG   | $\beta$ - sarcoglycan       | 1:100         | Novocastra Laboratories, UK |
| NCL- $\gamma$ -SG | $\gamma$ -sarcoglycan       | 1:100         | Novocastra Laboratories, UK |
| L- $\alpha$ 2     | Laminin $\alpha$ 2          | 1:200         | Gift of Eva Engvall [48]    |
| NCL-SPEC2         | Spectrin                    | 1:10          | Novocastra Laboratories, UK |
| NCL-MHCd          | Myosin heavy chain          | 1:20          | Novocastra Laboratories, UK |

**Table S2. mRNA expression – Primers.** Primer information, amplicon length, and amplicon location based on transcript variant X8 (Acc. No. XM\_045050794.1).

| Primer name | Primer sequence                  | Amplicon length | Amplicon location |
|-------------|----------------------------------|-----------------|-------------------|
| cDNA-F1:    | 5'-GGGAAGCAGCACATAGAGAACCT-3'    | 231 bp          | Exons 3-5         |
| cDNA-R1:    | 5'-ACCAAGAGTCAGTTTGTGATTCCATC-3' |                 |                   |
| cDNA-F2:    | 5'-GAACAGATGGTGAATGAGGGTGTT-3'   | 217 bp          | Exons 19-20       |
| cDNA-R2:    | 5'-ATGTGGTGGTAGGCTGGGTT-3'       |                 |                   |
| cDNA-F3:    | 5'-TGCCATCTTCCTTGCTGTTGG-3'      | 228 bp          | Exons 51-52       |
| cDNA-R3:    | 5'-AATTCTGGGCGGCGGTAATG-3'       |                 |                   |
| cDNA-F4:    | 5'-TCTGATGACGCAGCCCTGTT-3'       | 444 bp          | Exons 56-58       |
| cDNA-R4:    | 5'-TTCCCACTCGGTGTTGACCT-3'       |                 |                   |
| cDNA-F5:    | 5'-TCAGCTTATAGGACCGCCATGAA-3'    | 225 bp          | Exons 64-65       |
| cDNA-R5:    | 5'-ACACATATCCACGCAGAGAGGG-3'     |                 |                   |

**Table S3. mRNA expression – PCR/sequencing information.** PCR/sequencing mixes and programs used for each primer pair. Primer pair numbering is based on Table S2.

| Primer pair | PCR mix used | PCR program used |
|-------------|--------------|------------------|
| PPcDNA-1    | 1            | 1                |
| PPcDNA-2    | 3            | 2                |
| PPcDNA-3    | 1            | 2                |
| PPcDNA-4    | 2            | 2                |
| PPcDNA-5    | 1            | 2                |

|                                                                                                                                                                                                                                                                                                                                                                                                                    |                                                                                                                                      |
|--------------------------------------------------------------------------------------------------------------------------------------------------------------------------------------------------------------------------------------------------------------------------------------------------------------------------------------------------------------------------------------------------------------------|--------------------------------------------------------------------------------------------------------------------------------------|
| <b>PCR mix 1:</b><br>5.7 µl H <sub>2</sub> O (Thermo Fisher Scientific, Waltham, MA, USA)<br>1.0 µl 10x Key buffer (VWR International, Radnor, PA, USA)<br>1.0 µl Primers (5 µM each) (Integrated DNA Technologies, Coralville, IA, USA)<br>0.2 µl dNTPs (10 mM each) (VWR International)<br>0.1 µl TEMPase Hotstart DNA polymerase (5 U/µl) (VWR International)<br><u>2.0 µl Template</u><br>10.0 µl Total volume | <b>PCR program 1:</b><br>14'30" - 95°C<br>00'30" - 95°C ]<br>00'30" - 63°C ] x 35<br>01'00" - 72°C ]<br>04'00" - 72°C<br>Hold - 15°C |
| <b>PCR mix 2:</b><br>4.7 µl H <sub>2</sub> O<br>1.0 µl 10x Key buffer<br>1.0 µl Primers (5 µM each)<br>1.0 µl GC-rich (Roche Diagnostics, Switzerland)<br>0.2 µl dNTPs (10 mM each)<br>0.1 µl TEMPase Hotstart DNA polymerase (5 U/µl)<br><u>2.0 µl Template</u><br>10.0 µl Total volume                                                                                                                           | <b>PCR program 2:</b><br>14'30" - 95°C<br>00'30" - 95°C ]<br>00'30" - 61°C ] x 35<br>01'00" - 72°C ]<br>04'00" - 72°C<br>Hold - 15°C |
| <b>PCR mix 3:</b><br>3.7 µl H <sub>2</sub> O<br>1.0 µl 10x Key buffer<br>1.0 µl Primers (5 µM each)<br>2.0 µl GC-rich<br>0.2 µl dNTPs (10 mM each)<br>0.1 µl TEMPase Hotstart DNA polymerase (5 U/µl)<br><u>2.0 µl Template</u><br>10.0 µl Total volume                                                                                                                                                            |                                                                                                                                      |
| <b>Sequencing mix:</b><br>3.0 µl H <sub>2</sub> O<br>2.0 µl 5x SEQ-buffer (Thermo Fisher Scientific, Waltham, MA, USA)<br>1.5 µl Sequencing primer (2 µM)<br>1.0 µl GC-rich<br>0.5 µl RR-mix (Thermo Fisher Scientific, Waltham, MA, USA)<br><u>2.0 µl Template</u><br>10.0 µl Total volume                                                                                                                        | <b>Sequencing program:</b><br>2'00" - 95°C<br>0'20" - 95°C ]<br>0'10" - 60°C ] 30x<br>4'00" - 65°C ]<br>Hold - 15°C                  |

**Table S4. Transcript variant X8 – primers.** Primer information and amplicon length for sequencing of the X8 transcript variant.

| Primer name | Primer sequence                   | Amplicon length |
|-------------|-----------------------------------|-----------------|
| x8-F1       | 5'-TCACTCACTTTCCCCTTACAGGACT-3'   | 953 bp          |
| x8-R1       | 5'-GGATGGCTTCAATGCTCACTTGTT-3'    |                 |
| x8-F2       | 5'-GTGGTTTGCCAGCAGTCAGCC-3'       | 928 bp          |
| x8-R2       | 5'-GCACCTTATGTTGTTGTAAGTTGGCGT-3' |                 |
| x8-F3       | 5'-TGGGAAGTCAACTGATTGGAACAGGG-3'  | 924 bp          |
| x8-R3       | 5'-TTTGGGGAGGTGGTGGTGGC-3'        |                 |
| x8-F4       | 5'-AGCGTGGCTGGACAACCTTTGC-3'      | 915 bp          |
| x8-R4       | 5'-TCCTGATAGCGCATGGGTGGC-3'       |                 |
| x8-F5       | 5'-ACCGGCTTTCAGTTCTTCAGCC-3'      | 896 bp          |
| x8-R5       | 5'-AGCTTGCGTCATCCATTCGTGC-3'      |                 |
| x8-F6       | 5'-TCAGACAATTCAGCCAGTCTCAACA-3'   | 793 bp          |
| x8-R6       | 5'-TTGCCTCCTCACAGCCTCTTCA-3'      |                 |
| x8-F7       | 5'-GAAGGCAAACAAGTGGCTAAACGAAGT-3' | 904 bp          |
| x8-R7       | 5'-TCGCATCTTACGGGACAATTTCAAGCA-3' |                 |
| x8-F8       | 5'-CCTGCGTTGGAACAAGAGCGT-3'       | 775 bp          |
| x8-R8       | 5'-TTGCCATCAGGTTTGCTGCTTGG-3'     |                 |
| x8-F9       | 5'-AGCTGTCACCTCCCGAGCAGA-3'       | 739 bp          |
| x8-R9       | 5'-TCTGGGTTTCAAGTAGGCTGGC-3'      |                 |
| x8-F10      | 5'-TCACAGATGAGAGAAAGCGAGAGGAAA-3' | 957 bp          |
| x8-R10      | 5'-TTTGCCGCTGCCCCGATGC-3'         |                 |
| x8-F11      | 5'-TGCAGGAAGCTCTCTCACGGC-3'       | 797 bp          |
| x8-R11      | 5'-AGGAGCCAGCCACAGAAGCAG-3'       |                 |
| x8-F12      | 5'-CGGAGGAACAGTGCTTGTAAGTGC-3'    | 973 bp          |
| x8-R12      | 5'-CTCCAGCTTGGCTCTGGCCT-3'        |                 |
| x8-F13      | 5'-ACTCATTACCGCCGCCAGAA-3'        | 927 bp          |
| x8-R13      | 5'-AAATCGCCTCCCATCGGTGC-3'        |                 |
| x8-F14      | 5'-GGAAGGTTCTGATGACGCAGCC-3'      | 865 bp          |
| x8-R14      | 5'-GGAAAGGAAGTGCTGGGACGC-3'       |                 |
| x8-F15      | 5'-TGACCTTGCTCGCCAACTCACA-3'      | 915 bp          |
| x8-R15      | 5'-ACTCGGTGCAGGACAGGCAG-3'        |                 |
| x8-F16      | 5'-GCAAGTGGCAAGCTCCACAGG-3'       | 817 bp          |
| x8-R16      | 5'-GGCAGGACTACGAGGCTGGC-3'        |                 |
| x8-F17      | 5'-GATTCTGCGCCCGCCTCGT-3'         | 711 bp          |
| x8-R17      | 5'-CCCTGTGCTTGTGTCTTGGGG-3'       |                 |
| x8-F18      | 5'-GCCGAGGCCAAGGTGAATGG-3'        | 908 bp          |
| x8-R18      | 5'-GCCAGCGATTCCAAAAAGAGCAC-3'     |                 |
| x8-F19      | 5'-TGGAACGCATTTTGGGTTGTTA-3'      | 914 bp          |
| x8-R19      | 5'-GGCGGAGGGAATTCGTTGTA-3'        |                 |
| x8-F20      | 5'-ACTGTGTCCGAGTGATCCGTTAGC-3'    | 899 bp          |
| x8-R20      | 5'-ACAAGTGGGTGAAAGCATGTGTGC-3'    |                 |
| gDNA-F1     | 5'-AGGGCTTTGCCATGCTCGCAG-3'       | 425 bp          |
| gDNA-R1     | 5'-ACAACACTCGTCTACTTCTTCCACCA-3'  |                 |
| gDNA-F2     | 5'-TTAACTTTTGGGGAGTGGGTTTTG-3'    | 621 bp          |
| gDNA-R2     | 5'-AAACAATGACAGAACATGCCACA-3'     |                 |
| gDNA-F3     | 5'-CTTCTGTGGAAGGCGAGGTAGG-3'      | 500 bp          |
| gDNA-R3     | 5'-AGCTACACGTTCTAGGAGCAAAC-3'     |                 |

**Table S5. Transcript variant X8 – PCR/sequencing information.** PCR/sequencing mixes and programs used for each primer pair. Primer pair numbering is based on Table S4.

| Primer pair | PCR mix used | PCR program used |
|-------------|--------------|------------------|
| PPx8-1      | 1            | 2                |
| PPx8-2      | 1            | 1                |
| PPx8-3      | 1            | 1                |
| PPx8-4      | 1            | 1                |
| PPx8-5      | 1            | 1                |
| PPx8-6      | 1            | 1                |
| PPx8-7      | 1            | 1                |
| PPx8-8      | 1            | 1                |
| PPx8-9      | 1            | 1                |
| PPx8-10     | 1            | 1                |
| PPx8-11     | 1            | 1                |
| PPx8-12     | 1            | 1                |
| PPx8-13     | 1            | 1                |
| PPx8-14     | 1            | 1                |
| PPx8-15     | 1            | 1                |
| PPx8-16     | 1            | 1                |
| PPx8-17     | 1            | 1                |
| PPx8-18     | 2            | 1                |
| PPx8-19     | 1            | 2                |
| PPx8-20     | 1            | 1                |
| PPgDNA-1    | 1            | 1                |
| PPgDNA-2    | 1            | 2                |
| PPgDNA-3    | 1            | 1                |

|                                                                                                                                                                                                                                                         |                                                                                                                                      |
|---------------------------------------------------------------------------------------------------------------------------------------------------------------------------------------------------------------------------------------------------------|--------------------------------------------------------------------------------------------------------------------------------------|
| <b>PCR mix 1:</b><br>5.7 µl H <sub>2</sub> O<br>1.0 µl 10x Key buffer<br>1.0 µl Primers (5 µM each)<br>0.2 µl dNTPs (10 mM each)<br>0.1 µl TEMPase Hotstart DNA polymerase (5 U/µl)<br><u>2.0 µl Template</u><br>10.0 µl Total volume                   | <b>PCR program 1:</b><br>14'30" - 95°C<br>00'30" - 95°C ]<br>00'30" - 62°C ] x 35<br>01'00" - 72°C ]<br>04'00" - 72°C<br>Hold - 15°C |
| <b>PCR mix 2:</b><br>4.7 µl H <sub>2</sub> O<br>1.0 µl 10x Key buffer<br>1.0 µl Primers (5 µM each)<br>1.0 µl GC-rich<br>0.2 µl dNTPs (10 mM each)<br>0.1 µl TEMPase Hotstart DNA polymerase (5 U/µl)<br><u>2.0 µl Template</u><br>10.0 µl Total volume | <b>PCR program 2:</b><br>4'30" - 95°C<br>00'45" - 95°C ]<br>00'45" - 66°C ] x 35<br>01'30" - 72°C ]<br>04'00" - 72°C<br>Hold - 15°C  |
| <b>Sequencing mix:</b><br>3.0 µl H <sub>2</sub> O<br>2.0 µl 5x SEQ-buffer<br>1.5 µl Sequencing primer (2 µM)<br>1.0 µl GC-rich<br>0.5 µl RR-mix<br><u>2.0 µl Template</u><br>10.0 µl Total volume                                                       | <b>Sequencing program:</b><br>2'00" - 95°C<br>0'20" - 95°C ]<br>0'10" - 60°C ] 30x<br>4'00" - 65°C ]<br>Hold - 15°C                  |

**Table S6. Primer, probe, and qPCR information for *MYBPC3* genotyping.** Sequences of the primers and probes used for *MYBPC3* A31P genotyping are shown, with the resulting amplicon length and the used qPCR mix and program. F and R indicate forward and reverse primers, and Wt and Vt indicate the probes binding to the wildtype and variant strand, respectively.

| Primers                       | Probes                        | Amplicon length (bp) |
|-------------------------------|-------------------------------|----------------------|
| F: 5'- GAAGCCAAGGTCAGTG -3'   | Wt: FAM-TGTCTCGGCCTCGAA-BHQ1  | 131                  |
| R: 5'- CTAGGCCATACTTGTCAC -3' | Vt: TR- TGTCTCGGGCTCGAA -BHQ2 |                      |

|                                                                                                                                                                                                                                                                                                                                                        |                                                                                                                     |
|--------------------------------------------------------------------------------------------------------------------------------------------------------------------------------------------------------------------------------------------------------------------------------------------------------------------------------------------------------|---------------------------------------------------------------------------------------------------------------------|
| <b>qPCR mix:</b><br>4.9 µl H <sub>2</sub> O<br>1.0 µl 10x Key buffer<br>1.0 µl Primers (5 µM each)<br>0.4 µl Wt probe (10 µM) (Integrated DNA Technologies)<br>0.4 µl Vt probe (10 µM) (Integrated DNA Technologies)<br>0.2 µl dNTPs (10 mM each)<br>0.1 µl TEMPase Hotstart DNA polymerase (5 U/µl)<br><u>2.0 µl Template</u><br>10.0 µl Total volume | <b>qPCR program:</b><br>14'40" - 95°C<br>00'20" - 95°C        ]<br>00'40" - 60°C        ] x 40<br>FAM/TR detection] |
|--------------------------------------------------------------------------------------------------------------------------------------------------------------------------------------------------------------------------------------------------------------------------------------------------------------------------------------------------------|---------------------------------------------------------------------------------------------------------------------|

## Figures

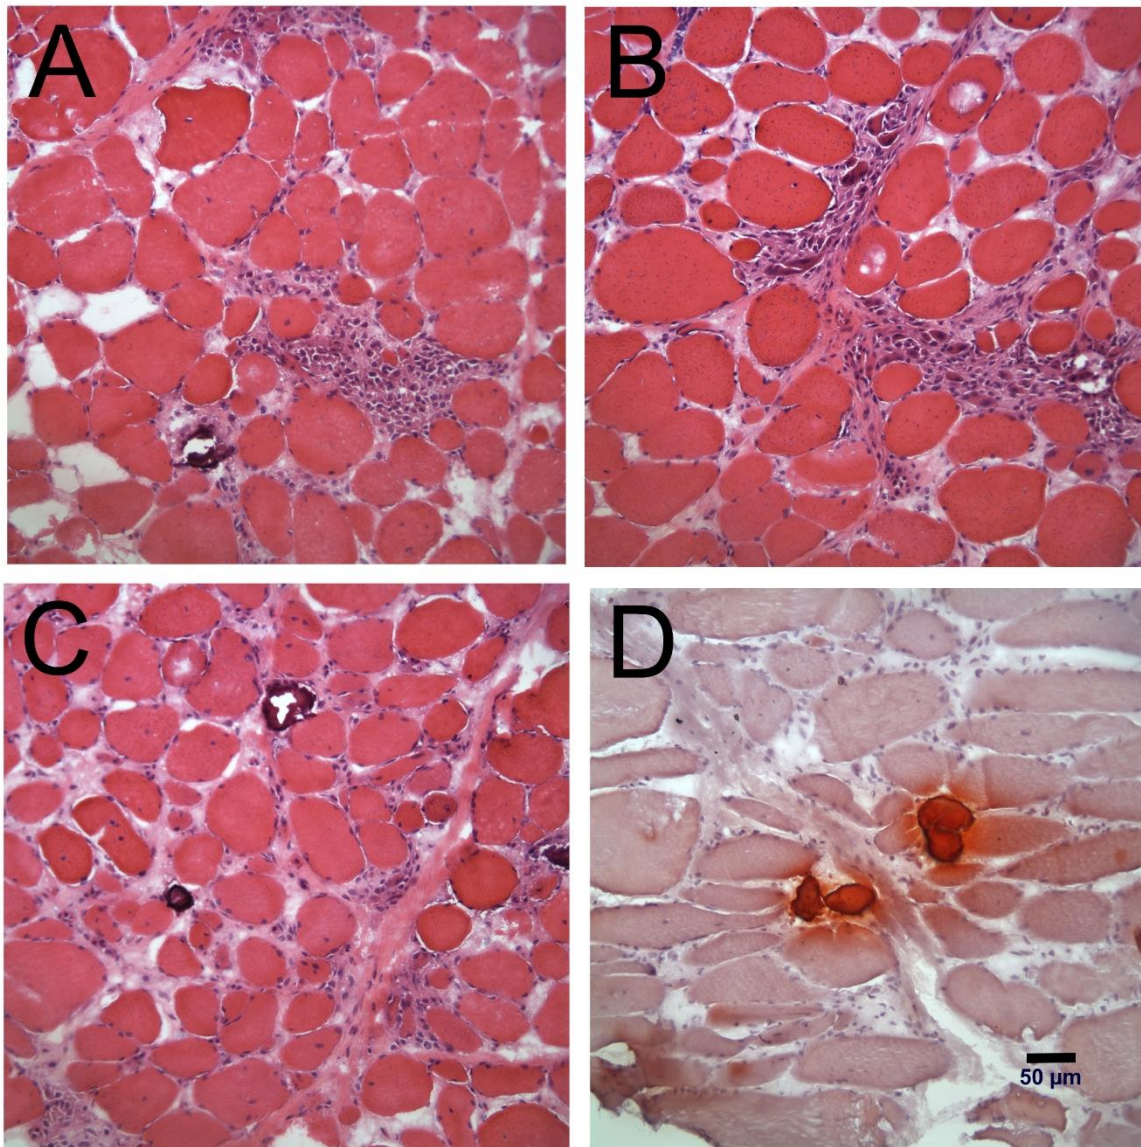

**Figure S1. Histopathology of muscle biopsies.** Histopathology of muscle biopsies from a Maine coon cat with a myopathic presentation and markedly elevated CK activity (case 1). A) Cryosection from the triceps muscle showing clusters of degenerating fibers. H&E stain. B) Cryosection from the triceps muscle showing clusters of regenerating fibers. H&E stain. C) Cryosection from the vastus lateralis muscle showing scattered calcific deposits. H&E stain. D) Alizarin stain of the vastus lateralis muscle confirming the calcium deposits. Magnification bar in D = 50 µm for all images.

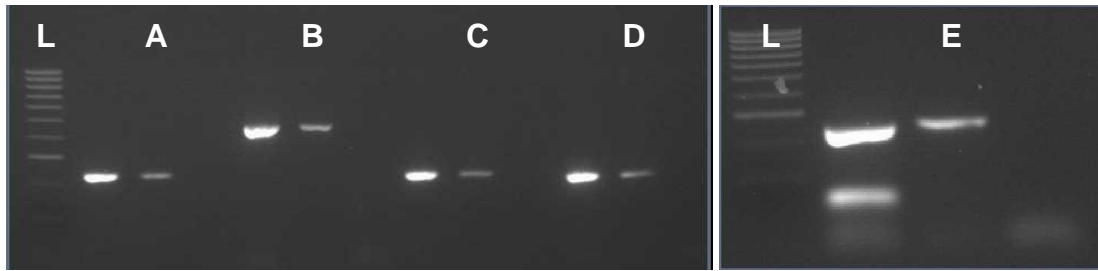

**Figure S2. mRNA gel electrophoresis results.** Gel electrophoresis results of the 5 PCR reactions inspecting the presence of mRNA in the affected muscle (case 2). L) HyperLadder 100bp (Bioline, UK). A-E) For each primer pair (PP), 10  $\mu$ l and 2  $\mu$ l and a non-template control are loaded. Amplicons for PPcDNA-1 (A), PPcDNA-2 (B), PPcDNA-3 (C), PPcDNA-4 (D), and PPcDNA-5 (E) are displayed.
